# Supplementary material for: High-content screening of yeast mutant libraries by shotgun lipidomics
Source: Royal Society of Chemistry journal article supplement (doi:10.1039/c3mb70599d), 2014-03-21
Supplement: c3mb70599d1.pdf [file c3mb70599d1.pdf]

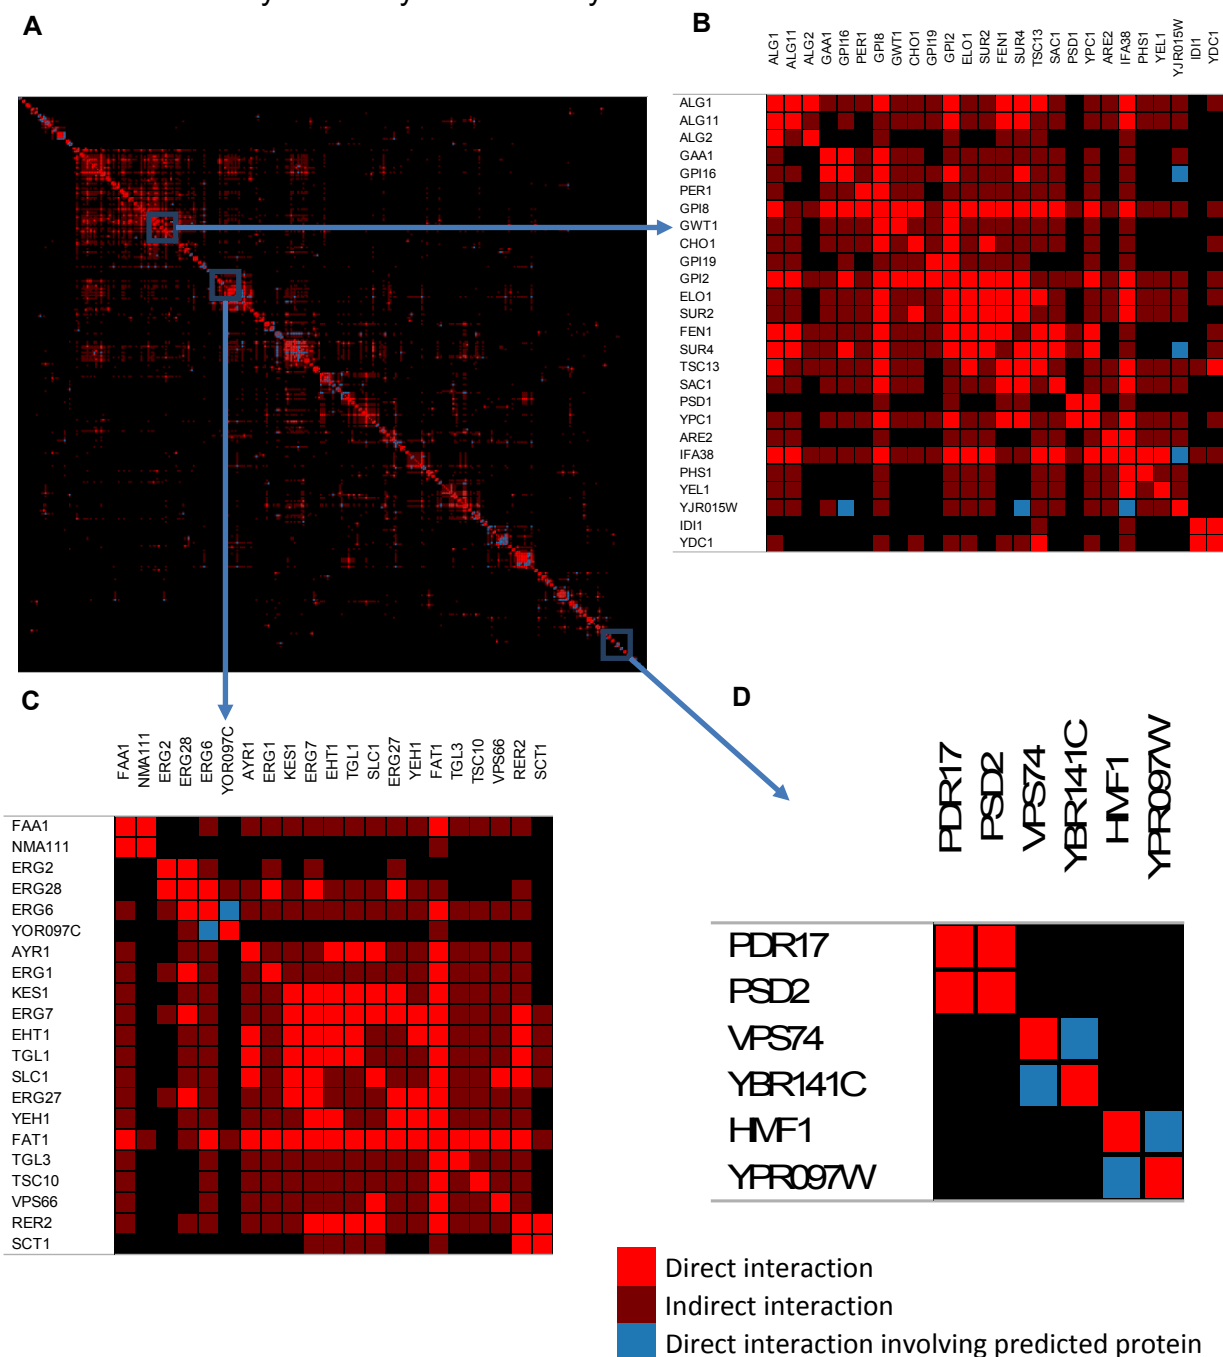

**Supplementary figure 1.** Protein-protein interaction network of lipid metabolism and function. (A) Protein-protein interaction network of proteins known or predicted to be involved in lipid homeostasis. Interaction data was retrieved from BioGRID, predictions are made by the GeneMANIA algorithm. Interactions between known and predicted proteins are arranged using average linkage agglomerative hierarchical clustering. Interactions between known members of lipid metabolism are shown in red; interactions between proteins predicted to be involved in lipid metabolism in blue. Detailed interaction network around predicted proteins Yjr015wp (B), Yor097cp (C) and Ybr141cp (D) are shown.
